1 Evolutionary implications of recombination differences across diverging  
2 populations of *Anopheles*

3 **Authors: Joel T. Nelson<sup>1</sup>, Omar E. Cornejo<sup>1\*</sup> and Ag1000G Consortium<sup>2</sup>**

4

5 <sup>1</sup> **School of Biological Sciences, Washington State University, Pullman WA. 99164**

6 <sup>2</sup> **Wellcome Sanger Institute, Hinxton, Cambridgeshire, CB10 1SD, United Kingdom**

7 (<https://www.malariagen.net/projects/ag1000g#people>)

8

9 **Corresponding: [omar.cornejo@wsu.edu](mailto:omar.cornejo@wsu.edu)**

10

11

12

13

14

15

16

17

18

19

20

21

22

23

24

25

26

27

28

29

30

31

32 **Abstract**

33           Recombination is one of the main evolutionary mechanisms responsible for changing the  
34 genomic architecture of populations; and in essence, it is the main mechanism by which novel  
35 combinations of alleles, haplotypes, are formed. A clear picture that has emerged across study  
36 systems is that recombination is highly variable, even among closely related species. However, it  
37 is only until very recently that we have started to understand how recombination variation  
38 between populations of the same species impact genetic diversity and divergence. Here, we used  
39 whole-genome sequence data to build fine-scale recombination maps for nine populations within  
40 two species of *Anopheles*, *Anopheles gambiae* and *Anopheles coluzzii*. The genome-wide  
41 recombination averages were on the same order of magnitude for all populations except one. Yet,  
42 we identified significant differences in fine-scale recombination rates among all population  
43 comparisons. We report that effective population sizes, and presence of a chromosomal inversion  
44 has major contribution to recombination rate variation along the genome and across populations.  
45 We identified over 400 highly variable recombination hotspots across all populations, where  
46 only 9.6% are shared between two or more populations. Additionally, our results are consistent  
47 with recombination hotspots contributing to both genetic diversity and absolute divergence (dxy)  
48 between populations and species of *Anopheles*. However, we also show that recombination has a  
49 small impact on population genetic differentiation as estimated with  $F_{ST}$ . The minimal impact  
50 that recombination has on genetic differentiation across populations represents the first empirical  
51 evidence against recent theoretical work suggesting that variation in recombination along the  
52 genome can mask or impair our ability to detect signatures of selection. Our findings add new  
53 understanding to how recombination rates vary within species, and how this major evolutionary  
54 mechanism can maintain and contribute to genetic variation and divergence within a prominent  
55 malaria vector.

56  
57  
58  
59  
60  
61  
62

## 63 **Introduction**

64 Meiotic recombination is the main evolutionary mechanism that shapes haplotypic  
65 variation in sexually reproducing species (Felsenstein 1974; San Filippo et al. 2008; Beeson et al.  
66 2019). A main result of recombination is the movement of alleles onto different genetic  
67 backgrounds, which has the potential to create novel combinations of beneficial haplotypes and  
68 novel haplotypes (Posada et al. 2002; Smagulova et al. 2016; Korunes and Noor 2017).  
69 Recombination can reduce interference between linked loci, thereof reducing mutational load,  
70 and it allows for beneficial mutations to sweep through a population more rapidly (Gabriel et al.  
71 1993; McVean, G. A. and Charlesworth 2000; Otto and Barton 2001; Hartfield and Keightley  
72 2012; Ritz et al. 2017). It has been suggested that elevated recombination rates can contribute to  
73 increased patterns of genetic diversity and divergence, though this relationship is not well  
74 understood (Smukowski and Noor 2011). Across most species, recombination is highly variable  
75 within and across chromosomes but tends to cluster in local regions identified as recombination  
76 hotspots (Hellsten et al. 2013; Beeson et al. 2019). Both fine-scale recombination rates and  
77 hotspots are poorly conserved across mammals and plants with significant differences even  
78 among closely related species (Spencer et al. 2006; Choi et al. 2016; Beeson et al. 2019; Dreissig  
79 et al. 2019). However, less is known about the onset of variation in recombination rates across  
80 diverging populations of the same species (Schwarzkopf et al. 2020) and how it impacts patterns  
81 of genetic variation. Comparing recombination maps across multiple populations of humans has  
82 recently been investigated; however, this question has not been applied to other model systems  
83 and was aimed at identifying the impact of demographic changes on the recombination landscape  
84 and not how elevated recombination impacts patterns of diversity and divergence (Spencer et al.  
85 2006). Thus, comparing recombination maps across closely related populations and quantifying  
86 its impact on genetic variation is imperative for elucidating how this mechanism shapes patterns  
87 of evolution.

88 Comparing recombination maps across closely related populations could help predict  
89 shifts in the recombination landscape that are responsible for species-level differences in  
90 recombination (Smukowski and Noor 2011). For example, comparing the recombination  
91 landscape across genomes with varying selective sweeps, effective populations sizes, and  
92 chromosomal inversions. These aspects of genomic evolution are known to impact  
93 recombination events, however the contribution they have towards recombination rate

94 differentiation across populations in generally unknown (Keightley and Otto 2006; Feder and  
95 Nosil 2009; Yang et al. 2018). Furthermore, comparing recombination landscapes among  
96 populations can also have significant contributions towards understanding the impact that  
97 elevated recombination rates have on patterns of genetic diversity and divergence (Brown and  
98 Jiricny 1987; Brown et al. 1989; Papavasiliou and Schatz 2000; Smukowski and Noor 2011). For  
99 instance, because of the hitchhiking effects of linked selection, local regions of the genome with  
100 significantly larger recombination rates (recombination hotspots) may act as reservoirs for  
101 genetic diversity. Previous studies have identified an increase in nucleotide diversity within  
102 regions of elevated recombination; however, there is a discord among studies for the number of  
103 differences between species within the same regions (Smukowski and Noor 2011; Roesti et al.  
104 2013). In concordance to genetic diversity and divergence, little is known about the impact that  
105 elevated recombination rates have on localized patterns of genetic differentiation ( $F_{ST}$ ); and if  
106 lower levels of differentiation are expected in regions of the genome with elevated  
107 recombination rates due to reduced linkage. Thus, understanding these patterns is an important  
108 step in elucidating the early onset of recombination rate evolution among closely related  
109 populations and the impact that elevated rates have on levels of genetic diversity and divergence.  
110 A perhaps more subtle, but equally important relevance of recombination in modern genomic  
111 studies is the potential impact that differences in recombination have on our ability to identify  
112 signatures of hard or soft sweeps in the genome. Using simulations, it has been shown that  
113 recombination acting on regions close to a hard sweep can generate patterns of polymorphism  
114 that resemble those found in soft sweeps, rendering them indistinguishable (Pennings and  
115 Hermisson 2006; Schrider et al. 2015).

116 To address recombination rate variation among closely related populations we used  
117 sequence data from two different species of *Anopheles*, *A. gambiae* and *A. coluzzii*; which are the  
118 major contributors to the spread of malaria (Holt et al. 2002; Anopheles gambiae 1000 Genomes  
119 Consortium 2017). There are several known populations of *A. gambiae* and *A. coluzzii* that have  
120 a large distribution throughout Africa, spanning across prominent ecological gradients  
121 (*Anopheles gambiae* 1000 Genomes Consortium 2017). Previous studies have identified several  
122 populations that have undergone expansions and bottlenecks, as well as containing the presence  
123 of selective sweeps and chromosomal inversions, characteristics that contribute to differences in  
124 the recombination architecture of populations (Lehmann et al. 1999; Anopheles gambiae 1000

125 Genomes Consortium 2017). Populations within this system have low background levels of  
126 genetic differentiation (White et al. 2010; Anopheles gambiae 1000 Genomes Consortium 2017).  
127 The combination of multiple population pairwise comparisons and low levels of genetic  
128 differentiation allows for robust detection of increased genetic differentiation and divergence in  
129 localized regions of the genome where recombination is elevated (e.g. recombination hotspots).  
130 There is a large body of evidence showing a correlation between recombination and nucleotide  
131 diversity in *Drosophila melanogaster* (Begun and Aquadro 1992; Andolfatto and Przeworski  
132 2001), with no consequence on divergence, which has led to suggest that natural selection is an  
133 important force structuring patterns of polymorphism along the genome (Wright et al. 2006). The  
134 pattern described for *Drosophila* has not always been replicated in other organisms, where  
135 divergence is at times correlated with recombination, suggesting a lack of generality on this  
136 observation (Nachman et al. 1998; Nachman 2001; Lercher and Hurst 2002; Cutter and Payseur  
137 2003; Hellmann, Ines et al. 2003; Hellmann, I. et al. 2005). We believe that a more extensive  
138 analysis of the architecture of recombination and genome-wide polymorphism is necessary to  
139 shed light into this phenomenon.

140

141 Here, we use whole genome data to infer fine-scale recombination maps across nine  
142 diverging populations of *A. gambiae* and *A. coluzzii* (Figure 1). Specifically, we 1) quantified the  
143 recombination landscape across populations and identified the impact that different  
144 evolutionary/genomic features have on recombination rates, 2) identified regions of the genome  
145 where recombination rates were significantly greater than average background levels (hotspots),  
146 and 3) quantified the impact of elevated recombination on population diversity and divergence.  
147 We expected to see large variations in recombination rates, even among closely related  
148 populations (fine-scale), yet smaller difference when comparing genome-wide rates (broad-  
149 scale). Based on what has been observed in studies in other organisms, we expected that  
150 differences in recombination hotspots will be similar to variation in recombination rates where  
151 most hotspots would be unique to a specific population. Simulation studies have shown that  
152 recombination differences can reduce our ability to detect regions of the genome under selection,  
153 evidenced by excessive differentiation. We expect that our analyses of recombination will allow  
154 to investigate the extent of these expectations in natural populations.

155 **Results**

156 *Comparing fine-scale recombination maps across diverging populations*

157 Average population-scaled recombination rate ( $\rho = 4Ne r$ , where  $Ne$  is the effective  
158 population size and  $r$  is the per site recombination rate; measures one recombination event per  
159 kb) across the entire genome was  $70.9 \rho$ . Population averages ranged from  $0.58 \rho$  (KES) to  
160  $140.26 \rho$  (CMS) (Table 1 & 2) (see Supplementary Figure S1 – S3 for summarized  
161 recombination maps for each species). Genome-wide recombination distributions followed a  
162 positively skewed distributions where most recombination events throughout the genome were  
163 low with the exceptions to localized regions with elevated recombination (Figure 2). Results  
164 from our Wilcoxon Rank test suggests significant difference in recombination rates across all  
165 population comparisons ( $p < 7.39e-14$ ) (Supplementary Table S1 & S2). After accounting for  
166 effective population size average per-site recombination rates ( $r$ ) were all on the same order of  
167 magnitude expect for KES (Table 2). Average recombination rates ( $\rho$ /bp) were roughly two  
168 orders of magnitude lower than fine-scale estimates across species of *Drosophila* (Chan et al.  
169 2012). Indeed, fine-scale recombination rates within *Anopheles* were in the lower quantile when  
170 including recombination estimates from other insect systems (Stapley et al. 2017).

171 *Ne, chromosomal location, inversions influence recombination variation, and sweeps*

172 Populations with a smaller effective population size (AOM, GAS, and KES) exhibited a  
173 lower variance across the recombination landscape, while populations with a large effective  
174 population size reported nearly 100 times larger variance in the recombination landscape (Figure  
175 2). When considering chromosomal location, we identified large reductions in recombination  
176 rates within centromeric regions of each chromosome, however, this patten was more prominent  
177 along the X chromosome (Figure 2 & 3). As expected, for populations that were polymorphic  
178 for chromosomal inversions, all recombination estimates (with the exception to BFS) fell below  
179 the genome average within inverted regions and then increased once outside of the inversion  
180 (Table 3; Figure 3). This pattern was not observed for populations that were homozygous for the  
181 inverted or wild-type genotypes (Figure 3), further confirming the characterization of the  
182 polymorphism of the inversion in these populations. Furthermore, Wilcoxon Rank test suggest  
183 significant difference among all pairwise comparisons in recombination rates within genomic  
184 regions containing the 2La and 2Rb inversion ( $p < 2.2e-16$ ) (Supplementary Table S3 & S4).  
185 Lastly, we also showed that recombination rates were largely suppressed within insecticide  
186 resistant (IR) genes that have been identified as under strong selection in previous studies

187 (Anopheles gambiae 1000 Genomes Consortium 2017). For example, the decrease in  
188 recombination rates in a 1 Mb region within the Cyp6p gene and a 3Mb region within the  
189 Cyp9k1 gene (Figure 4; also see Supplementary Figure S4-S9). For IR genes that were putatively  
190 evolving under neutral conditions (or weak signals of selection), we did not identify a prominent  
191 reduction in recombination rates or change in the topography of the recombination map.

#### 192 *Identifying unique and shared recombination hotspots*

193 We identified a total of 435 robust signatures consistent with a recombination hotspot  
194 (Figure 5; Supplementary Table S5). In most populations, the average recombination rate within  
195 hotspots was at least twice as large as the adjacent background; however, the average  
196 recombination rates within hotspots were only slightly larger than the average genome-wide  
197 recombination rate across all populations ( $HS = \sim 71.0 \rho$ , genome =  $\sim 70.0 \rho$ ). Moreover, for  
198 autosomal chromosomes, we identified 383 hotspots with an average of 48 hotspots per  
199 population. Of the 383 autosomal hotspots, 344 were unique to a single population while 39 were  
200 shared between two or more populations. For the X chromosome, we retained a total of 52  
201 recombination hotspots with an average of six hotspots per population. Among the 52 hotspots,  
202 51 were unique to a single population while only a single hotspot was shared between two  
203 populations (GWA and KES). A total of 26 population pairwise comparisons shared  
204 recombination hotspots.

205 Despite finding very little evidence of overlapping (shared) hotspots, empirical overlaps  
206 were on average larger than expected when hotspots were randomly shuffled throughout the  
207 genome, resulting in a positive net difference (empirical hotspot overlap – shuffled overlap;  
208 Supplementary Table S6). Furthermore, pairwise Fishers Exact test showed that a total of 19 (out  
209 of 26) comparisons had significantly larger hotspot overlaps than stochastic expectation ( $p <$   
210  $0.05$ ; Supplementary Table S6). Of the 19 significant comparisons, most were found between  
211 populations of *A. gambiae* (14 comparisons) while the remaining comparisons were between *A.*  
212 *gambiae* and *A. coluzzii*; there were no significant hotspot overlaps within *A. coluzzii*.

#### 213 *Consequences of recombination hotspots on population diversity, and divergence*

214 Average nucleotide diversity was larger within recombination hotspots ( $0.02578 \pm$   
215  $0.00073$ ) compared to genomic background estimates ( $0.02257 \pm 0.00002201$ ) (Figure 6). Across  
216 the genome, we show that within most populations, nucleotide diversity was significantly larger  
217 ( $p < 0.05$ ) within recombination hotspots than compared to the surrounding background levels

218 (Figure 6). Moreover, for autosomal chromosomes, the average nucleotide diversity was  
219 significantly larger within recombination hotspots ( $0.02893 \pm 0.00038$ ) than compared to the  
220 average background ( $0.02567 \pm 0.00001322$ ). Across the X chromosome, nucleotide diversity  
221 followed similar patterns where nucleotide diversity was significantly larger within  
222 recombination hotspots ( $0.02264 \pm 0.00109$ ) than compared to the genomic background  
223 ( $0.01947 \pm 0.0000308$ ) (Figure 6).

224 Similar to nucleotide diversity, average estimates of dxy proved to be larger within  
225 recombination hotspots ( $0.0244 \pm 0.0004$ ) when compared to a genome-wide estimate ( $0.0215 \pm$   
226  $0.0000122$ ). Between autosomal and the X chromosome most population pairwise comparisons  
227 support evidence suggesting significant differences ( $p < 0.05$ ) in the number of per site  
228 differences within recombination hotspots (Figure 7A). Moreover, across autosomal  
229 chromosomes average dxy was larger within recombination hotspots ( $0.0272 \pm 0.000325$ ) than  
230 average dxy estimates across the genome ( $0.0241 \pm 0.0000113$ ). For the X chromosome, average  
231 dxy estimates were larger within recombination hotspots ( $0.0215 \pm 0.000475$ ) than compared to  
232 dxy along the X chromosome ( $0.0189 \pm 0.0000130$ ) (Supplementary Figure S10). Regions  
233 within recombination hotspots experience  $\sim 3.0\%$  more nucleotide differences per site than the  
234 entire X chromosome.

235 When we examine the patterns of  $F_{ST}$  we find that of the 72 comparisons, 51 (70.8%)  
236 showed an increase in  $F_{ST}$  within recombination hotspots, whereas the remaining 21 comparisons  
237 (29.2%) showed a decrease in  $F_{ST}$  within hotspots (Figure 7B). However, the difference ratio  
238 between the genomic background  $F_{ST}$  and adjacent hotspot  $F_{ST}$  zero, suggesting very little  
239 change in relative genetic differentiation between hotspots and the adjacent background for all  
240 comparisons. Despite this, we still identified 13 comparisons where  $F_{ST}$  was significantly greater  
241 than what was predicted from the distribution of  $F_{ST}$  for non-hotspot regions. Variance of  $F_{ST}$   
242 followed similar patterns where across all hotspots it was higher ( $0.00742$ ) when compared to the  
243  $F_{ST}$  variance of the adjacent genomic backgrounds ( $0.00702$ ); however, this difference was not  
244 significant ( $p = 0.0660$ ).

245

## 246 Discussion

247 In this study, we report the first recombination landscape for multiple populations of *A.*  
248 *gambiae* and *A. coluzzii*. We identified large variations in recombination rates across all



249 populations. We showed that effective population size, chromosomal location (centromeric  
250 regions), chromosomal inversions, and selective sweeps all contribute to recombination  
251 differentiation among populations. We identified several hotspots on both X and autosomal  
252 chromosomes suggesting regions of the genome with significantly higher recombination rates.  
253 Lastly, we showed significant associations between recombination hotspots, nucleotide diversity,  
254 and relative/absolute divergence, suggesting that recombination hotspots may be playing a role  
255 in not only maintaining within population diversity, but also contributing to between population  
256 divergence.

### 257 *Fine-scale recombination rates across populations of Anopheles*

258 Consistent with other study systems, our results suggest differences in recombination  
259 rates among populations (Kong et al. 2002; Nachman 2002; Smukowski and Noor 2011) (Figure  
260 2; Table 1). Our results suggest that these differences are not just the consequence of overall  
261 changes in recombination rate among populations, but the result of differences in fine-scale  
262 recombination rates along the genome (Table 2), consistent with recent findings (Spence and  
263 Song 2019). Importantly, these patterns were consistent with previous studies showing high  
264 levels of recombination divergence at fine scale, whereas more conservation in recombination  
265 rates across the entire genome (Smukowski and Noor 2011). It has been proposed that variation  
266 in recombination rates is due to evolutionary constraints that allows for a lower and upper bound  
267 of recombination (Smukowski and Noor 2011; Ritz et al. 2017). Lower recombination rates may  
268 prove to be maladaptive as the genome lacks the ability to create novel haplotypes and reduce  
269 interference of deleterious mutations. Conversely, extremely high levels of recombination have  
270 the potential to break up beneficial haplotypes and gene complexes, proving to be maladaptive.  
271 These bounds may be responsible for the conservation of the average genome-wide  
272 recombination rates, however, the localized differences in recombination may represent the  
273 variation in recombination within evolutionary constraints., or the presence of selective sweeps.  
274 Regions of the genome with recently fixed selective sweeps might display excessive LD and low  
275 recombination (Kim and Nielsen 2004; Sibley and Ajioka 2008). We see this pattern reflected in  
276 the recombination landscape of *Anopheles* when we focus on genes involved in insecticide  
277 resistance, and more thoroughly discuss this results in the following sections.

278

### 279 *Evolutionary and genomic features shaping the recombination landscape*

280 We showed that the recombination landscape is heavily influenced by evolutionary and  
281 genomic features such as effective population size, chromosomal location, inversions, and  
282 selective sweeps. For example, populations that are south of the Congo River basin (AOM and  
283 GAS) and east of the African Rift valley (KES) have shown genomic evidence of recent  
284 bottlenecks (Lehmann et al. 1999; Anopheles gambiae 1000 Genomes Consortium 2017). Indeed  
285 AOM, GAS, and KES had the lowest variance, as well as reduced population-scaled  
286 recombination ( $\rho/kb$ ) (Figure 2A). However, when calculating the per site recombination rate to  
287 account for effective population size, KES had an average recombination rate that was an order  
288 of magnitude larger than the other populations. As demonstrated within previous studies,  
289 populations with a small effective population size may exhibit higher recombination rates  
290 associated to an increase accumulation of deleterious mutations in homogenized genomes  
291 (Keightley and Otto 2006; Kumar et al. 2019; Schwarzkopf et al. 2020). Because KES has had a  
292 small historical  $N_e$  ( $\sim 10,000$ ), we hypothesize that the deleterious effects of a low  $N_e$  have  
293 contributed to a increased overall recombination rates within KES; however, this hypothesis  
294 needs to be tested.

295 Chromosomal location is also a major influence on the recombination landscape. For  
296 example, recombination was reduced near the centromeric regions for all populations (Figure 2  
297 & 3). Reduced recombination near centromeres has been previously observed (Nambiar and  
298 Smith 2016). Recombination within centromeric regions is often considered maladaptive where  
299 it can break up conserved blocks of genes and interfere with proper chromosome segregation  
300 during meiosis, which has the potential to create aneuploid progeny (Nambiar and Smith 2016).  
301 In the case of *A. gambiae* and *A. coluzzii*, each species is grouped by a molecular form based off  
302 diagnostic genetic differences in the ribosomal DNA, near centromeric regions of the X  
303 chromosome (Coetzee et al. 2013; Aboagye-Antwi et al. 2015). These fixed differences have  
304 been shown to play a role in positive assortative mating, thus reducing gene flow between the  
305 two species (Aboagye-Antwi et al. 2015). It has long been speculated that low levels of  
306 recombination rates along the X chromosome have contributed to reproductive isolation between  
307 *A. gambiae* and *A. coluzzii*. Here, for the first time, we show drastic reduction in recombination  
308 rates along the centromeric regions of the X chromosomes across all sampled populations that  
309 supports the underlining hypothesis of little recombination near the centromere of the X  
310 chromosome.

311 Of the six inversions within *Anopheles*, two of them, 2Rb and 2La, show prominent  
312 associations for specific environments (rain-dependent vs. rain-independent) (Coluzzi et al.  
313 1979; Lanzaro and Lee 2013; Cheng et al. 2018). For populations that are homozygous for either  
314 chromosomal inversion (2La or 2Rb), or the wild type (no inversion), there were no reductions in  
315 recombination rates across the 2La and 2Rb chromosomal inversions. Indeed, the inversion loop  
316 does not need to form during meiosis (Figure 3; Table 3), and therefore, does not result in  
317 maladaptive indels within recombinant chromosomes. However, for populations that were  
318 polymorphic for the inversions, recombination rates within the inversion were largely  
319 suppressed. This drastic reduction in recombination was also followed by an increase in  
320 recombination along regions that flank the inversions (Figure 3; Table 3). Though, for  
321 populations that were polymorphic for chromosomal inversions we still detected evidence for  
322 successful recombination events within these inversions, and in some cases, recombination  
323 hotspots. Successful recombination within inversions could be explained by a double cross-over  
324 within inversion loops which, can potentially prevent the major insertions/deletions that occur  
325 between inverted and non-inverted homologous chromosomes, resulting in successful  
326 recombinant progeny. Previous studies focusing on the clinal variation of chromosomal  
327 inversions have suggested that relaxed pressure for the 2La inversion in non-arid regions may  
328 lead to an increase in recombination (through double cross-overs) within inverted regions (Cheng  
329 et al. 2012).

330

### 331 *Recombination rates within insecticide resistance genes*

332 Because of long-term exposure to insecticides, recent selection analyses show signatures  
333 of molecular adaptation across several genes known to be involved with insecticide resistance  
334 (*Anopheles gambiae* 1000 Genomes Consortium 2017). Although this exposure has been  
335 relatively long in an ecological timeframe; the selection imposed by insecticides on *Anopheles*  
336 populations have only been acting recently in an evolutionary time scale. The implications for  
337 the evolution of resistance in these populations is that we expect to see reduced recombination in  
338 areas surrounding the genes involved in insecticide resistance. These regions are of great  
339 importance because as insecticide resistance increases, *Anopheles* becomes increasingly difficult  
340 to control and indirectly making the spread of malaria tough to mitigate. Recombination is  
341 especially important because of its ability to generate novel haplotypes which may increase

342 insecticide resistance, especially under models that apply an evolutionary arms race (Clay and  
343 Kover 1996). However, here we show that within IR genes, especially within Cyp6p and Cyp9k1  
344 (both known for the resistance towards DDT, and pyrethroid-based compounds), recombination  
345 is reduced within 1-3Mb of the IR gene (Figure 4; Supplementary Figure S2-S7). These genes  
346 were found to be under selection in UGS and BFM, however, they are neutrally (or show a weak  
347 signal of selection) evolving in other populations such as GAS and AOM (*Anopheles gambiae*  
348 1000 Genomes Consortium 2017). For those populations with neutrally evolving IR genes, we  
349 found no change in the recombination rates within the same regions (See Figure 4). For those  
350 populations with neutrally evolving IR genes, we found no change in the recombination rates  
351 within the same regions. This is consistent with the recent selective sweeps containing little  
352 variation and reduced signature of recombination. An alternative explanation, is that  
353 recombination within IR genes may break apart favorable haplotypes and otherwise prove to be  
354 maladaptive in terms of insecticide resistance, with natural selection preventing the spread of  
355 recombinants in the population. Perhaps a comprehensive study involving the differences in  
356 fitness across recombinant and parental chromosomes when exposed to varying levels of  
357 insecticides could help us shed some light between the role that recombination and selection play  
358 in the evolution of this locus.

359

### 360 *Identifying recombination hotspots*

361 Because of the absence of recombination hotspots in *Drosophila* (Chan et al. 2012), a  
362 main question in recombination studies is if this pattern is true across other insect systems,  
363 including those that are closely related to *Drosophila*? Implementing LD methods, which have  
364 not been applied to *Drosophila* systems in order to identify hotspots, we identified a total of 436  
365 genomic regions that were consistent with recombination hotspots within *Anopheles* (Figure 5;  
366 Supplementary Table S5). Majority of recombination hotspots were unique to a specific  
367 population, however, only 9.6% (40 hotspots) were shared between two or more populations.

368 For all population pairwise comparisons that shared a hotspot, all but one had empirical  
369 overlaps that were larger than the overlaps generate from stochastic hotspot shuffling  
370 (Supplementary Table S6). Moreover, for the 25 comparisons where the empirical overlap was  
371 larger than the simulated overlaps, Fisher's Exact test showed that 19 comparisons were  
372 statistically significant (p-value < 0.05), suggesting a sharing in recombination hotspots more so

373 than what is expected under a stochastic assumption (Supplementary Table S6). It should be  
374 noted that most of the significant overlaps were within populations of *A. gambiae*, however there  
375 were few significant overlaps between *A. gambiae* and *A. coluzzii*, and none within *A. coluzzii*.  
376 This is a very interesting finding because it demonstrates the potential conservation of few  
377 recombination hotspots within the *Anopheles* genome, which may be serving a functionally  
378 important role in the generation of novel variation within the genome.

379

380 *Consequences of recombination hotspots on population diversity, and divergence and*  
381 *implications for the identification of adaptive variation*

382 Within autosomal chromosomes, we identified significant differences between nucleotide  
383 diversity within recombination hotspots and average genomic levels. Specifically, nucleotide  
384 diversity was significantly higher in recombination hotspots for all populations with the  
385 exception of KES (Figure 6). Because of the recent, and severe, bottleneck for *Anopheles* within  
386 Kenya, it is not surprising that there were no significant differences in nucleotide diversity.  
387 Similarly, for the X chromosome, all nucleotide diversity comparisons also proved to be  
388 significant (Figure 6). Identifying significant increase in nucleotide diversity within  
389 recombination hotspot is an interesting finding because it suggests an evolutionary role for  
390 recombination in the maintenance of genetic variation. More specifically, the presence of  
391 recombination hotspots could be acting as protected reservoirs for genetic variation by reducing  
392 the effects of linked selection.

393 Much like nucleotide diversity, the number of per-site differences (dxy) between  
394 populations followed similar patterns along the autosomal chromosomes, where dxy within  
395 recombination hotspots were significantly larger than background estimates for 66 of 72 (91.6%)  
396 comparisons, suggesting an increase in population divergence within these regions (Figure 7A).  
397 The only population comparisons that did not show a significant increase in dxy within hotspots  
398 were within AOM and KES. These two populations have smaller effective population sizes and  
399 could be a contributing factor to why these populations experienced lower overall changes in  
400 dxy. Similarly, along the X chromosome, we identified significant increases in dxy within  
401 recombination hotspots for 43 of 46 (93.4%) comparisons, suggesting that population divergence  
402 is significantly larger within these regions (Supplementary Figure S10). Much like the  
403 autosomes, two comparisons within AOM and one within GAS did not reflect significant

404 differences in  $d_{xy}$ . Effective population size for GAS was estimated to be on the same order of  
405 magnitude as AOM, further supporting an increased role of genetic drift across the genome  
406 resulting in higher background levels of genetic divergence. With the exception to nine  
407 comparisons, the remaining comparisons support a mutagenic hypothesis where the mechanistic  
408 properties of recombination not only influence variation within a population, but also drives  
409 localized regions of the genome to have elevated levels of divergence. The other nine  
410 comparisons support a linked selection hypothesis where recombination is maintaining genetic  
411 diversity within populations, but elevated levels of divergence are larger where recombination  
412 rates are lower. Importantly, these results suggest that recombination hotspots are maintaining,  
413 and potentially generating, genetic diversity and contributing to absolute genetic divergence  
414 within and between species of *Anopheles*.

415         The relationship between the recombination landscape and  $F_{ST}$  is more complex than  
416 patterns of diversity and divergence (as measured by  $d_{xy}$ ). For example, we showed that only  
417 29.2% of our pairwise comparisons suggest that  $F_{ST}$  was lower within recombination hotspots  
418 when compared to the average genome (Figure 7B). Despite the differences in background and  
419 hotspot genetic differentiation being close to zero (suggesting little difference between the two  
420 comparisons) 13 pairwise comparisons were significantly higher  $F_{ST}$  within recombination  
421 hotspot compared to background estimates. These empirical data suggest that elevated  
422 recombination rates may not play an essential role in reducing levels of genetic differentiation.  
423 However, our results provide little insight on the efficacy of elevated  $F_{ST}$  within regions of low  
424 recombination and warrants further investigation. Patterns of genetic differentiation are a  
425 common statistic in population genetics used to infer differences in allele frequencies and  
426 sometime selection. Here we provide evidence that suggests that regions of the genome with  
427 increased recombination rates can retain genetic variation and suppress patterns of genetic  
428 differentiation between populations. However, the data also suggest that elevated recombination  
429 rates can still lead to patterns of increased genetic differentiation. Overall, we find that the  
430 recombination landscape can have significant impacts on patterns of genetic diversity,  
431 divergence, but potentially a smaller impact on patterns of  $F_{ST}$ . We suggest that future studies  
432 involved with identifying patterns of genetic diversity and divergence across populations also  
433 incorporate the recombination landscape, to better infer the patterns of genetic variation.

#### 434 **Conclusion**

435 In this study, we detailed the fine-scale recombination maps and hotspot locations across  
436 nine populations containing two species of *Anopheles*; *A. gambiae* and *A. coluzzii*. We identified  
437 patterns of recombination rates that are similar to other systems that show large rate variation.  
438 We also show that changes in the landscape of recombination maps strongly depends on location  
439 along the chromosome, chromosomal inversions, and selective sweeps within IR genes. The  
440 changes in recombination rates along the genome are even more prominent near the centromeric  
441 regions of the X chromosome where recombination rates are minimal and may be responsible for  
442 maintaining species boundaries between *A. gambiae* and *A. coluzzii*. The proportion of unique  
443 and shared hotspots support the findings of other studies suggesting that there is a quick  
444 evolutionary turnover of hotspots and recombination rates; however, few hotspot locations may  
445 be more conserved, potentially serving important biological functions within the genome. Lastly,  
446 we show evidence that recombination hotspots have the potential to increase both nucleotide  
447 diversity within populations and the number of nucleotide differences between populations. This  
448 was also true for patterns of relative genetic differentiation; however, these results were less  
449 consistent and show that elevated recombination can also reduce levels of genetic differentiation.  
450 Overall, our results provide significant insight into the evolutionary role of recombination across  
451 populations of *Anopheles*, which can be implemented for further understanding evolutionary  
452 trajectory of a prominent biological vector.

453

## 454 **Materials and Methods**

### 455 *Sample and Sequence data*

456 For this study we used full genome data from previously published work that was aimed  
457 at characterizing the genomic structure, patterns of selection, migration, and estimates of  
458 effective population size ( $N_e$ ) for *A. gambiae* and *A. coluzzii* (*Anopheles gambiae* 1000 Genomes  
459 Consortium 2017). Specifically, sequencing was performed on an Illumina HiSeq 2000 platform  
460 at the Wellcome Trust Sanger Institute. All sequence reads were aligned to the AgamP3  
461 reference genome (Sharakhova et al. 2007) using bwa (Li and Durbin 2009) and Single  
462 Nucleotide Polymorphisms (SNPs) were discovered using GATK under their best practices  
463 protocol (DePristo et al. 2011; Van der Auwera, Geraldine A et al. 2013). For more information  
464 pertaining to the sequence data used and sample collection see (*Anopheles gambiae* 1000  
465 Genomes Consortium 2017). We used a total of 441 individuals (882 genomes) sampled over

466 nine populations, eight countries, and two species of *Anopheles*. Sample sizes ranged from 88 to  
467 120 genomes per population (Figure 1; Supplementary Table S7). Prior to estimating  
468 recombination rates, we filtered bi-allelic phased SNP data to account for a minor allele  
469 frequency of at least three individuals, missing data, and fixed sites.

#### 470 *Estimating fine-scale recombination rates*

471 To estimate fine-scale recombination rates, we used LDhat which is a package of  
472 programs that estimates population recombination rates by implementing the composite  
473 likelihood method of Hudson et al. (2001) (Hudson 2001; McVean, Gil and Auton 2007).  
474 Because obtaining fine-scale estimates of recombination across a genome for a large number of  
475 samples is computationally exhaustive, we decomposed all genomic data in two different  
476 components to help reduce computational resources. First, LDhat was ran in parallel within each  
477 population allowing the split of individuals and reduced memory usage. Second, instead of  
478 estimating recombination rates for the entire genome at one time, each chromosome arm was  
479 divided into sliding windows, further reducing the amount of memory required for each  
480 population/chromosome. Each window contained 2,000 SNPs including a 500 SNP overlap  
481 between adjacent windows and ran for 100,000,000 iterations with a burn-in period of  
482 50,000,000 iterations. LDhat sampled every 10,000 iterations, providing 10,000 sampled  
483 recombination rates per site under the INTERVAL function. After obtaining recombination rates  
484 the STATS function was implemented in LDhat which calculates the mean, median, upper 95%,  
485 and lower 95% recombination rate for each SNP. Windows were then trimmed of their overlaps  
486 and aligned to their respected positions along the chromosome. This pipeline was performed on  
487 both autosomal and X chromosomes, however, within the *Anopheles* system males are the  
488 heterogametic sex. We, therefore, included only females for building the recombination maps for  
489 the X chromosome. In total we used 417 females for estimating recombination rates along the X  
490 chromosome (see Supplementary Table S7).

#### 491 *Detecting recombination hotspots*

492 In order to detect recombination hotspots, we used LDhot, which is a program designed  
493 to identify regions of the genome where recombination rates are significantly larger than  
494 background levels (McVean, G. A. et al. 2004; Myers et al. 2005). Specifically, LDhot defines a  
495 Poisson distribution with a given lambda coupled with a sliding window approach to identify  
496 regions of the genome that have recombination rates explained by a different lambda and Poisson



497 distribution (McVean, G. A. et al. 2004). If localized patterns of recombination rates are better  
498 explained by a different Poisson distribution, then LDhot flags the window as a recombination  
499 hotspot. Poisson distributions were defined based off 1,000 simulations. Only sliding windows  
500 with a p-value  $\leq 0.01$  were retained and then merged together using BedTools MERGE (Quinlan  
501 and Hall 2010) to identify the size and location of the recombination hotspot.

502 However, because LDhot is known to lose power when population-scaled recombination  
503 rates are low ( $\rho < 5$ ) (Johnston and Cutler 2012; Wall and Stevison 2016) we retained hotspots  
504 that only showed large deviations in recombination rates from the surrounding background.  
505 Specifically, we compared recombination rates within hotspots to the recombination rates for the  
506 surrounding 50 kb background (the same size flanks that LDhot uses to detect hotspots). We  
507 used the difference in recombination rates between hotspots and the adjacent 50kb background to  
508 rank the intensity of recombination hotspots along a given background (supplemental Figures  
509 S11-S16). We retained only the top 5% of hotspots with the largest difference in rho when  
510 compared to the surrounding background rates for each population. Though this method is  
511 conserved, we have a greater confidence in our filtered hotspots as being true hotspots and not an  
512 artifact of demographic and computational limitations.

513 After hotspots were identified, we used UpSet in R to view the union and intersection of  
514 hotspots for all population pairwise comparisons (Conway et al. 2017). For all pairwise  
515 comparisons that shared at least one recombination hotspot, we wanted to test if these hotspots  
516 were more likely shared due to stochastic processes (random hotspot location within the genome)  
517 or if there was potential evidence of hotspot conservation between populations (shared more than  
518 random expectations). Here, the degree of overlap was determined by how many base pairs were  
519 shared within a given recombination hotspot. Specifically, to perform stochastic shuffling of  
520 recombination hotspots, we used BedTools SHUFFLE (Quinlan and Hall 2010) to randomly  
521 shuffle known hotspot locations for each chromosome arm. Recombination hotspots were  
522 shuffled for 10,000 iterations where the degree of overlap (in bp) was calculated for each  
523 iteration. The differences between average simulated and empirical overlaps were then  
524 calculated; a positive net difference suggests that empirical overlaps were larger than the  
525 shuffled overlaps. To complement stochastic simulations, we performed a Fishers Exact Test,  
526 using BedTools, to identify significant deviations from our null hypothesis of stochastic hotspot  
527 sharing across all empirical overlaps. We defined a significant overlap with a p-value  $< 0.05$ .

528 *Consequences of elevated recombination on diversity and divergence*

529         We compared levels of diversity within and between populations to understand potential  
530 consequences that recombination has on genetic diversity and divergence. For this, levels of  
531 nucleotide diversity ( $\pi$ ) were calculated within recombination hotspots and compared to the per  
532 site genome-wide estimates of  $\pi$  for each population. Because of prominent reproductive  
533 isolation along the X chromosome, this analysis was performed on the autosomal and X  
534 chromosome separately. To determine significant differences for  $\pi$  between hotspots and the  
535 genomic background a Wilcoxon Rank test was performed; a non-parametric statistical test that  
536 does not assume the data are normally distributed, which is the case for estimates of  $\pi$  (p-value  $\leq$   
537 0.05). To test for elevated levels of divergence within recombination hotspots we calculated two  
538 different metrics of genetic divergence: absolute divergence (dxy) and relative divergence ( $F_{ST}$ ).  
539 Specifically, for dxy, we calculated the number of per site differences for each recombination  
540 hotspot for each population pairwise comparison and compared dxy estimates across the average  
541 genomic background level.. A Wilcoxon Rank Test was performed for each dxy pairwise  
542 comparison was used to identify significant deviations (p-value  $\leq$  0.05).

543         We used a randomization approximation to test the significance of the difference in  $F_{ST}$   
544 between regions with HS of recombination and Background. For this, each the  $F_{ST}$  values for  
545 each region were labeled as HS or Background, and a shuffling procedure of the labels was used  
546 to generate 1000 pseudo-replicates. The average difference in  $F_{ST}$  between relabeled HS and  
547 Background regions was estimated for each pseudo-replicate and a distribution was generated.  
548 An empirical p-value (p-value  $\leq$  0.05) for the significance of the observed difference was  
549 determined by looking at the proportion of pseudo-replicates with values larger than 95% of the  
550 observed difference.

551

552

553

554

555

556

557

## References

- 558 Aboagye-Antwi F, Alhafez N, Weedall GD, Brothwood J, Kandola S, Paton D, Fofana A,  
559 Olohan L, Betancourth MP, Ekechukwu NE et al. 2015. Experimental swap of *Anopheles*  
560 *gambiae*'s assortative mating preferences demonstrates key role of X-chromosome divergence  
561 island in incipient sympatric speciation. *PLoS Genet.* 11:e1005141.
- 562 Andolfatto P, Przeworski M. 2001. Regions of lower crossing over harbor more rare variants in  
563 African populations of *Drosophila melanogaster*. *Genetics.* 158:657-665.
- 564 *Anopheles gambiae* 1000 Genomes Consortium. 2017. Genetic diversity of the African malaria  
565 vector *Anopheles gambiae*. *Nature.* 552:96.
- 566 Beeson SK, Mickelson JR, McCue ME. 2019. Exploration of fine-scale recombination rate  
567 variation in the domestic horse. *Genome Res.* 29:1744-1752.
- 568 Begun DJ, Aquadro CF. 1992. Levels of naturally occurring DNA polymorphism correlate with  
569 recombination rates in *D. melanogaster*. *Nature.* 356:519.
- 570 Brown TC, Jiricny J. 1987. A specific mismatch repair event protects mammalian cells from loss  
571 of 5-methylcytosine. *Cell.* 50:945-950.
- 572 Brown TC, Zbinden I, Cerutti PA, Jiricny J. 1989. Modified SV40 for analysis of mismatch  
573 repair in simian and human cells. *Mutation Research/Reviews in Genetic Toxicology.* 220:115-  
574 123.
- 575 Chan AH, Jenkins PA, Song YS. 2012. Genome-wide fine-scale recombination rate variation in  
576 *Drosophila melanogaster*. *PLoS Genet.* 8:e1003090.
- 577 Cheng C, Tan JC, Hahn MW, Besansky NJ. 2018. Systems genetic analysis of inversion  
578 polymorphisms in the malaria mosquito *Anopheles gambiae*. *Proc Natl Acad Sci U S A.*  
579 115:7005-7014.
- 580 Cheng C, White BJ, Kamdem C, Mockaitis K, Costantini C, Hahn MW, Besansky NJ. 2012.  
581 Ecological genomics of *Anopheles gambiae* along a latitudinal cline: a population-resequencing  
582 approach. *Genetics.* 190:1417-1432.
- 583 Choi K, Reinhard C, Serra H, Ziolkowski PA, Underwood CJ, Zhao X, Hardcastle TJ, Yelina  
584 NE, Griffin C, Jackson M. 2016. Recombination rate heterogeneity within *Arabidopsis* disease  
585 resistance genes. *PLoS Genetics.* 12:e1006179.
- 586 Clay K, Kover PX. 1996. The Red Queen hypothesis and plant/pathogen interactions. *Annu Rev*  
587 *Phytopathol.* 34:29-50.

- 588 Coetzee M, Hunt RH, Wilkerson R, Della Torre A, Coulibaly MB, Besansky NJ. 2013.  
589 *Anopheles coluzzii* and *Anopheles amharicus*, new members of the *Anopheles gambiae*  
590 complex. *Zootaxa*. 3619:246-274.
- 591 Coluzzi M, Sabatini A, Petrarca V, Di Deco M. 1979. Chromosomal differentiation and  
592 adaptation to human environments in the *Anopheles gambiae* complex. *Trans R Soc Trop Med*  
593 *Hyg.* 73:483-497.
- 594 Conway JR, Lex A, Gehlenborg N. 2017. UpSetR: an R package for the visualization of  
595 intersecting sets and their properties. *Bioinformatics*. 33:2938-2940.
- 596 Cutter AD, Payseur BA. 2003. Selection at linked sites in the partial selfer *Caenorhabditis*  
597 *elegans*. *Mol Biol Evol.* 20:665-673.
- 598 DePristo MA, Banks E, Poplin R, Garimella KV, Maguire JR, Hartl C, Philippakis AA, Del  
599 Angel G, Rivas MA, Hanna M. 2011. A framework for variation discovery and genotyping using  
600 next-generation DNA sequencing data. *Nat Genet.* 43:491.
- 601 Dreissig S, Mascher M, Heckmann S. 2019. Variation in recombination rate is shaped by  
602 domestication and environmental conditions in barley. *Mol Biol Evol.* 36:2029-2039.
- 603 Feder JL, Nosil P. 2009. Chromosomal inversions and species differences: when are genes  
604 affecting adaptive divergence and reproductive isolation expected to reside within inversions?  
605 *Evolution: International Journal of Organic Evolution.* 63:3061-3075.
- 606 Felsenstein J. 1974. The evolutionary advantage of recombination. *Genetics.* 78:737-756.
- 607 Gabriel W, Lynch M, Bürger R. 1993. Muller's ratchet and mutational meltdowns. *Evolution.*  
608 47:1744-1757.
- 609 Hartfield M, Keightley PD. 2012. Current hypotheses for the evolution of sex and  
610 recombination. *Integrative Zoology.* 7:192-209.
- 611 Hellmann I, Ebersberger I, Ptak SE, Pääbo S, Przeworski M. 2003. A neutral explanation for the  
612 correlation of diversity with recombination rates in humans. *The American Journal of Human*  
613 *Genetics.* 72:1527-1535.
- 614 Hellmann I, Prüfer K, Ji H, Zody MC, Paabo S, Ptak SE. 2005. Why do human diversity levels  
615 vary at a megabase scale? *Genome Res.* 15:1222-1231.
- 616 Hellsten U, Wright KM, Jenkins J, Shu S, Yuan Y, Wessler SR, Schmutz J, Willis JH, Rokhsar  
617 DS. 2013. Fine-scale variation in meiotic recombination in *Mimulus* inferred from population  
618 shotgun sequencing. *Proc Natl Acad Sci U S A.* 110:19478-19482.

- 619 Holt RA, Subramanian GM, Halpern A, Sutton GG, Charlab R, Nusskern DR, Wincker P, Clark  
620 AG, Ribeiro JM, Wides R et al. 2002. The genome sequence of the malaria mosquito *Anopheles*  
621 *gambiae*. *Science*. 298:129-149.
- 622 Hudson RR. 2001. Two-locus sampling distributions and their application. *Genetics*. 159:1805-  
623 1817.
- 624 Johnston HR, Cutler DJ. 2012. Population demographic history can cause the appearance of  
625 recombination hotspots. *The American Journal of Human Genetics*. 90:774-783.
- 626 Keightley PD, Otto SP. 2006. Interference among deleterious mutations favours sex and  
627 recombination in finite populations. *Nature*. 443:89-92.
- 628 Kim Y, Nielsen R. 2004. Linkage disequilibrium as a signature of selective sweeps. *Genetics*.  
629 167:1513-1524.
- 630 Kong A, Gudbjartsson DF, Sainz J, Jonsdottir GM, Gudjonsson SA, Richardsson B,  
631 Sigurdardottir S, Barnard J, Hallbeck B, Masson G. 2002. A high-resolution recombination map  
632 of the human genome. *Nat Genet*. 31:241.
- 633 Korunes KL, Noor MA. 2017. Gene conversion and linkage: effects on genome evolution and  
634 speciation. *Mol Ecol*. 26:351-364.
- 635 Kumar R, Duhamel M, Coutant E, Ben-Nahia E, Mercier R. 2019. Antagonism between BRCA2  
636 and FIGL1 regulates homologous recombination. *Nucleic Acids Res*. 47:5170-5180.
- 637 Lanzaro GC, Lee Y. 2013. Speciation in *Anopheles gambiae*—The distribution of genetic  
638 polymorphism and patterns of reproductive isolation among natural populations. In: Anonymous  
639 *Anopheles mosquitoes-New insights into malaria vectors*. ed Manguin S (Intech, Rijeka,  
640 Croatia).
- 641 Lehmann T, Hawley W, Grebert H, Danga M, Atieli F, Collins F. 1999. The Rift Valley complex  
642 as a barrier to gene flow for *Anopheles gambiae* in Kenya. *Journal of Heredity*, 90(6):613-621.
- 643 Lercher MJ, Hurst LD. 2002. Human SNP variability and mutation rate are higher in regions of  
644 high recombination. *Trends in Genetics*. 18:337-340.
- 645 Li H, Durbin R. 2009. Fast and accurate short read alignment with Burrows–Wheeler transform.  
646 *Bioinformatics*. 25:1754-1760.
- 647 McVean G, Auton A. 2007. LDhat 2.1: A package for the population genetic analysis of  
648 recombination. Oxford, United Kingdom: Department of Statistics. Accessed  
649 at: <http://www.stats.ox.ac.uk/~mcvean/LDhat/manual.pdf>  
650 . Department of Statistics, Oxford, OX1 3TG, UK.

- 651 McVean GA, Charlesworth B. 2000. The effects of Hill-Robertson interference between weakly  
652 selected mutations on patterns of molecular evolution and variation. *Genetics*. 155:929-944.
- 653 McVean GA, Myers SR, Hunt S, Deloukas P, Bentley DR, Donnelly P. 2004. The fine-scale  
654 structure of recombination rate variation in the human genome. *Science*. 304:581-584.
- 655 Myers S, Bottolo L, Freeman C, McVean G, Donnelly P. 2005. A fine-scale map of  
656 recombination rates and hotspots across the human genome. *Science*. 310:321-324.
- 657 Nachman MW. 2002. Variation in recombination rate across the genome: evidence and  
658 implications. *Curr Opin Genet Dev*. 12:657-663.
- 659 Nachman MW. 2001. Single nucleotide polymorphisms and recombination rate in humans.  
660 *TRENDS in Genetics*. 17:481-485.
- 661 Nachman MW, Bauer VL, Crowell SL, Aquadro CF. 1998. DNA variability and recombination  
662 rates at X-linked loci in humans. *Genetics*. 150:1133-1141.
- 663 Nambiar M, Smith GR. 2016. Repression of harmful meiotic recombination in centromeric  
664 regions. *Genetics*. 54:188-197.
- 665 Otto SP, Barton NH. 2001. Selection for recombination in small populations. *Evolution*.  
666 55:1921-1931.
- 667 Papavasiliou FN, Schatz DG. 2000. Cell-cycle-regulated DNA double-strand breaks in somatic  
668 hypermutation of immunoglobulin genes. *Nature*. 408:216.
- 669 Pennings PS, Hermisson J. 2006. Soft sweeps III: the signature of positive selection from  
670 recurrent mutation. *PLoS Genet*. 2:e186.
- 671 Posada D, Crandall KA, Holmes EC. 2002. Recombination in evolutionary genomics. *Annu Rev*  
672 *Genet*. 36:75-97.
- 673 Quinlan AR, Hall IM. 2010. BEDTools: a flexible suite of utilities for comparing genomic  
674 features. *Bioinformatics*. 26:841-842.
- 675 Ritz KR, Noor MA, Singh ND. 2017. Variation in recombination rate: adaptive or not? *Trends in*  
676 *Genetics*. 33:364-374.
- 677 Roesti M, Moser D, Berner D. 2013. Recombination in the threespine stickleback genome—  
678 patterns and consequences. *Mol Ecol*. 22:3014-3027.
- 679 San Filippo J, Sung P, Klein H. 2008. Mechanism of eukaryotic homologous recombination.  
680 *Annu Rev Biochem*. 77:229-257.

- 681 Schridder DR, Mendes FK, Hahn MW, Kern AD. 2015. Soft shoulders ahead: spurious signatures  
682 of soft and partial selective sweeps result from linked hard sweeps. *Genetics*. 200:267-284.
- 683 Schwarzkopf EJ, Motamayor JC, Cornejo OE. 2020. Genetic differentiation and intrinsic  
684 genomic features explain variation in recombination hotspots among cocoa tree populations.  
685 *BMC Genomics*. 21:1-16.
- 686 Sharakhova MV, Hammond MP, Lobo NF, Krzywinski J, Unger MF, Hillenmeyer ME,  
687 Bruggner RV, Birney E, Collins FH. 2007. Update of the *Anopheles gambiae* PEST genome  
688 assembly. *Genome Biol*. 8:R5.
- 689 Sibley LD, Ajioka JW. 2008. Population structure of *Toxoplasma gondii*: clonal expansion  
690 driven by infrequent recombination and selective sweeps. *Annu Rev Microbiol*. 62:329-351.
- 691 Smagulova F, Brick K, Pu Y, Camerini-Otero RD, Petukhova GV. 2016. The evolutionary  
692 turnover of recombination hot spots contributes to speciation in mice. *Genes Dev*. 30:266-280.
- 693 Smukowski C, Noor M. 2011. Recombination rate variation in closely related species. *Heredity*.  
694 107:496.
- 695 Spence JP, Song YS. 2019. Inference and analysis of population-specific fine-scale  
696 recombination maps across 26 diverse human populations. *Science Advances*. 5:eaaw9206.
- 697 Spencer CC, Deloukas P, Hunt S, Mullikin J, Myers S, Silverman B, Donnelly P, Bentley D,  
698 McVean G. 2006. The influence of recombination on human genetic diversity. *PLoS Genetics*.  
699 2:e148.
- 700 Stapley J, Feulner PG, Johnston SE, Santure AW, Smadja CM. 2017. Variation in recombination  
701 frequency and distribution across eukaryotes: patterns and processes. *Philosophical Transactions  
702 of the Royal Society B: Biological Sciences*. 372:20160455.
- 703 Van der Auwera, Geraldine A, Carneiro MO, Hartl C, Poplin R, Del Angel G, Levy Moonshine  
704 A, Jordan T, Shakir K, Roazen D, Thibault J. 2013. From FastQ data to high confidence variant  
705 calls: the genome analysis toolkit best practices pipeline. *Current Protocols in Bioinformatics*.  
706 43:11.10. 1-11.10. 33.
- 707 Wall JD, Stevison LS. 2016. Detecting Recombination Hotspots from Patterns of Linkage  
708 Disequilibrium. *G3 (Bethesda)*. 6:2265-2271.
- 709 White BJ, Cheng C, Simard F, Costantini C, Besansky NJ. 2010. Genetic association of  
710 physically unlinked islands of genomic divergence in incipient species of *Anopheles gambiae*.  
711 *Mol Ecol*. 19:925-939.
- 712 Wright SI, Foxe JP, DeRose-Wilson L, Kawabe A, Looseley M, Gaut BS, Charlesworth D. 2006.  
713 Testing for effects of recombination rate on nucleotide diversity in natural populations of  
714 *Arabidopsis lyrata*. *Genetics*. 174:1421-1430.

715 Yang L, Ouyang H, Fang Z, Zhu W, Wu E, Luo G, Shang L, Zhan J. 2018. Evidence for  
716 intragenic recombination and selective sweep in an effector gene of *Phytophthora infestans*.  
717 *Evolutionary Applications*. 11:1342-1353.

718

719

720

721

722

723

724

725

726

727

728

729

730

731

732

733

734

735

736

737

738

739

740

741

742

743

744

745



746 Table 1. The average population-scaled ( $\rho$ ) recombination rate for the entire genome, each  
747 autosomal chromosome arm, and the X chromosome.

| <b>Population</b> | <b><math>\rho</math> (avg.)</b> | <b>2L</b> | <b>2R</b> | <b>3L</b> | <b>3R</b> | <b>X</b> | <b>Variance</b> |
|-------------------|---------------------------------|-----------|-----------|-----------|-----------|----------|-----------------|
| <b>AOM</b>        | 7.8                             | 6.5       | 7.4       | 9.9       | 9.2       | 6.1      | 39.7765         |
| <b>BFM</b>        | 111                             | 107.1     | 60.7      | 138       | 131.9     | 117.5    | 6910.2          |
| <b>GWA</b>        | 64.6                            | 20.4      | 16.1      | 95.4      | 89        | 102.2    | 4965.31         |
| <b>BFS</b>        | 119.8                           | 70.5      | 107.8     | 151.2     | 145.3     | 124.1    | 10373.1         |
| <b>CMS</b>        | 129.3                           | 58.3      | 105.8     | 158.9     | 159.5     | 164      | 12530.1         |
| <b>GAS</b>        | 4.4                             | 4.4       | 4.5       | 5.3       | 5.6       | 2.1      | 14.2874         |
| <b>GNS</b>        | 110.9                           | 54.4      | 93.8      | 125.5     | 124       | 157      | 7618.57         |
| <b>KES</b>        | 0.5                             | 0.3       | 0.3       | 0.3       | 0.2       | 1.3      | 1.69677         |
| <b>UGS</b>        | 89.9                            | 36        | 85.6      | 78.6      | 113.3     | 135.8    | 8032.67         |
| <b>Average</b>    | 70.9                            | 39.8      | 53.6      | 84.8      | 86.5      | 90       | 5609.52         |

748  
749  
750  
751  
752  
753  
754  
755  
756  
757  
758  
759  
760  
761  
762  
763  
764  
765  
766  
767  
768  
769

770 Table 2. The average per-site ( $r$ ) recombination rate for the entire genome, each autosomal  
771 chromosome arm, and the X chromosome.

| Population     | $r$ (avg.) | 2L ( $r$ ) | 2R ( $r$ ) | 3L ( $r$ ) | 3R ( $r$ ) | X ( $r$ ) | cM/Mb      |
|----------------|------------|------------|------------|------------|------------|-----------|------------|
| AOM            | 1.95E-09   | 1.62E-09   | 1.85E-09   | 2.48E-09   | 2.29E-09   | 1.51E-09  | 0.19509262 |
| BFM            | 2.78E-09   | 2.68E-09   | 1.52E-09   | 3.45E-09   | 3.30E-09   | 2.94E-09  | 0.27760314 |
| GWA            | 3.26E-09   | 5.11E-09   | 4.02E-09   | 2.38E-09   | 2.23E-09   | 2.55E-09  | 0.161564   |
| BFS            | 2.99E-09   | 1.76E-09   | 2.70E-09   | 3.78E-09   | 3.63E-09   | 3.10E-09  | 0.29947138 |
| CMS            | 3.23E-09   | 1.46E-09   | 2.65E-09   | 3.97E-09   | 3.99E-09   | 4.10E-09  | 0.32330976 |
| GAS            | 1.10E-09   | 1.09E-09   | 1.13E-09   | 1.33E-09   | 1.41E-09   | 5.34E-10  | 0.1099353  |
| GNS            | 2.77E-09   | 1.36E-09   | 2.35E-09   | 3.14E-09   | 3.10E-09   | 3.92E-09  | 0.2773442  |
| KES            | 1.23E-08   | 7.38E-09   | 8.49E-09   | 6.46E-09   | 5.87E-09   | 3.33E-08  | 1.22950744 |
| UGS            | 3.87E-09   | 9.00E-09   | 2.14E-09   | 1.97E-09   | 2.83E-09   | 3.40E-09  | 0.22465757 |
| <b>Average</b> | 3.81E-09   | 3.50E-09   | 2.98E-09   | 3.22E-09   | 3.18E-09   | 6.15E-09  | 0.34427616 |

772  
773  
774  
775  
776  
777  
778  
779  
780  
781  
782  
783  
784  
785  
786  
787  
788  
789  
790  
791  
792

793 Table 3. Averaged population-scaled recombination rate for the seven different inversions across  
794 sampled populations of *Anopheles*. The shaded boxes represents populations where there are at  
795 least three heterozygous genotypes for the 2Rb or the 2La inversion.

| Population | $\rho$<br>(avg.) | 2Rb(avg.) | 2La(avg.) |
|------------|------------------|-----------|-----------|
| AOM        | 8.22             | 11.17     | 7.06      |
| BFM        | 104.54           | 20.41     | 103.77    |
| GWA        | 50.61            | 15.58     | 8.29      |
| BFS        | 117.71           | 146.71    | 32.79     |
| CMS        | 118.96           | 87.55     | 15.04     |
| GAS        | 4.95             | 5.45      | 4.22      |
| GNS        | 98.78            | 73.21     | 7.84      |
| KES        | 0.29             | 0.30      | 0.27      |
| UGS        | 80.60            | 56.32     | 11.40     |

796

797

798

799

800

801

802

803

804

805

806

807

808

809

810

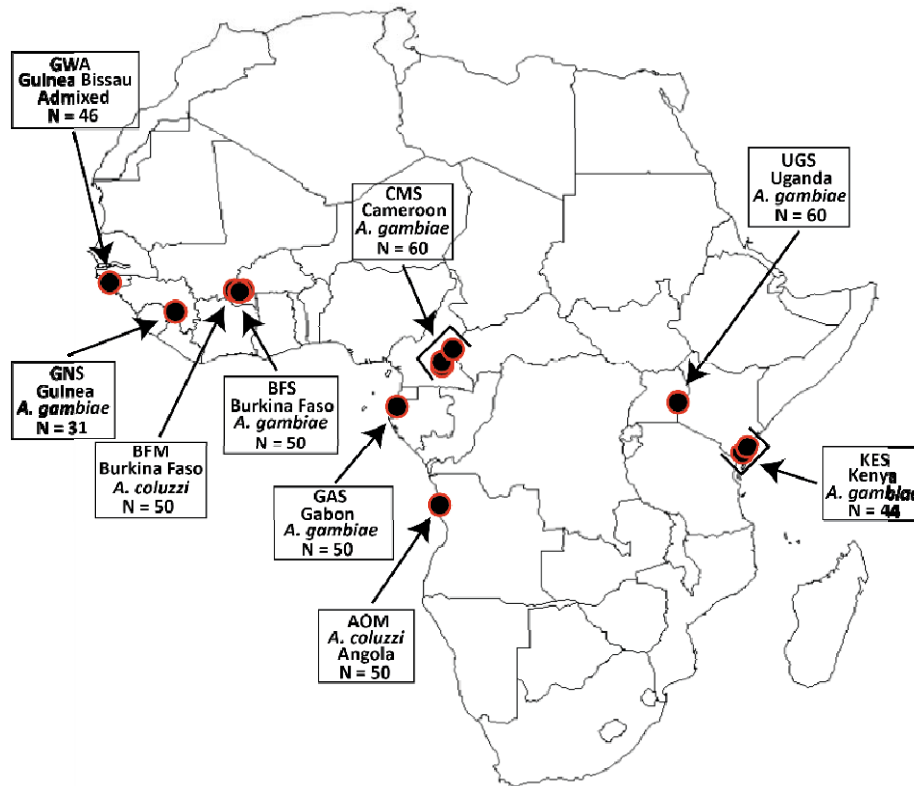

811

812 Figure 1. Map of Africa depicting the locations and sample sizes of each populations used for  
813 estimating recombination rates. Note that for several populations there multiple sampling  
814 locations.

815

816

817

818

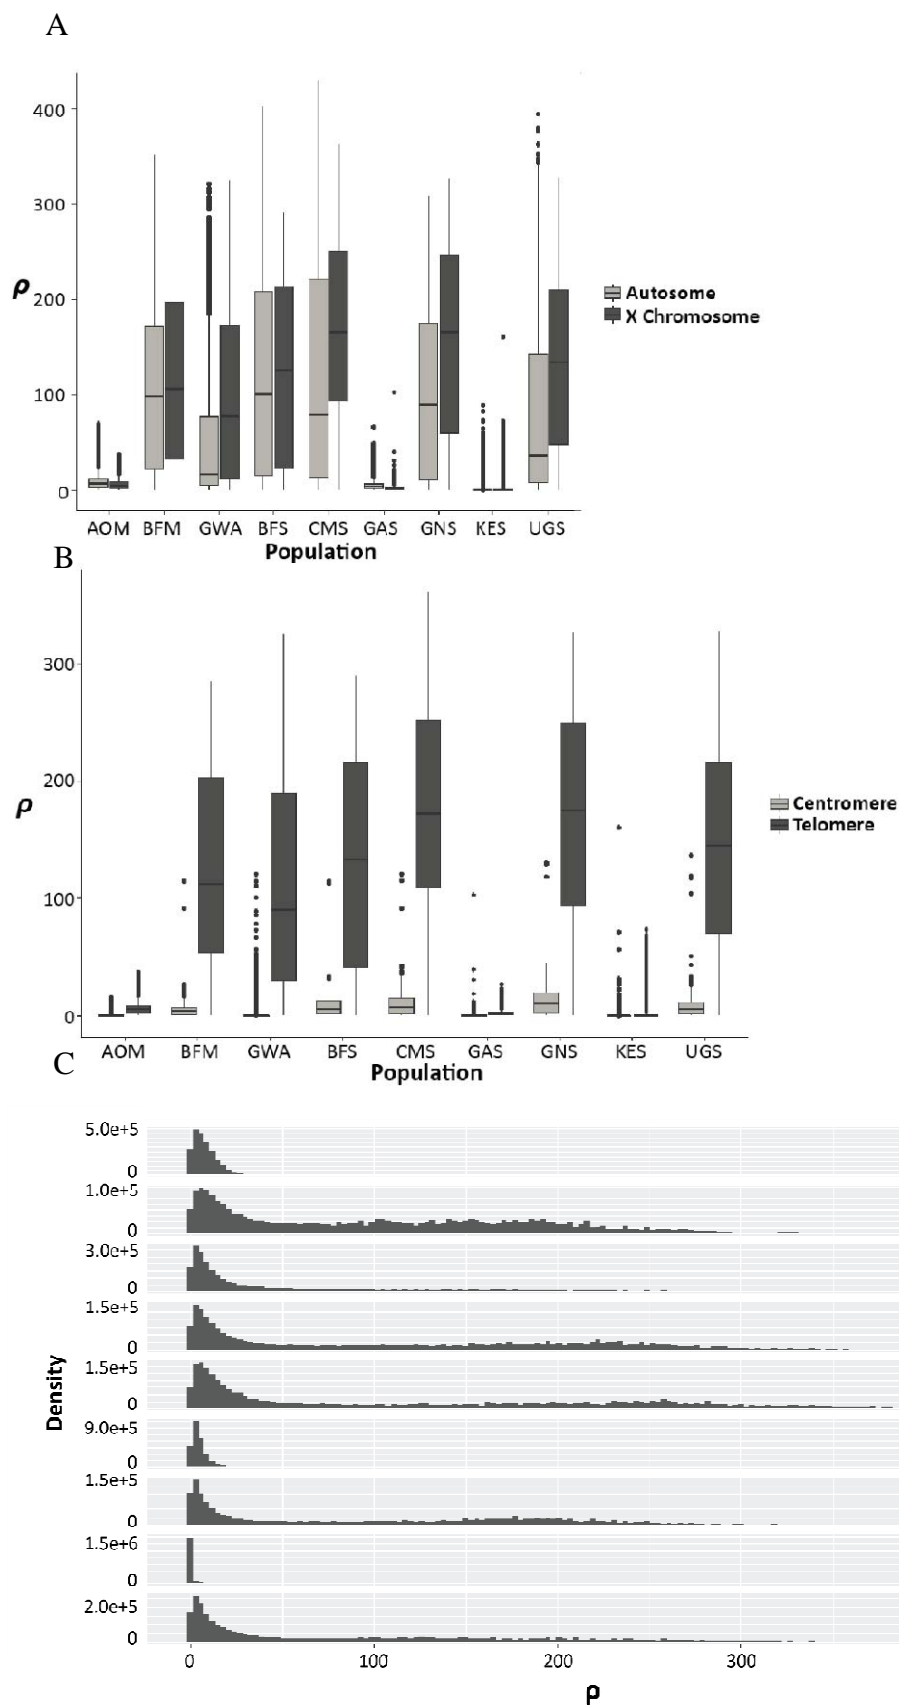

819

820

821

822

Figure 2. Top panel (A) depicts a boxplot showing the degree of variation in population-scaled recombination rates within and across populations for the autosomal genome and the X

823 chromosome. The middle panel (B) shows the difference in population-scaled recombination  
824 rates between the first 18Mb (Telomere) and the last 6Mb (Centromere) of the X chromosome  
825 for each population. The bottom panel (C) represents individual histograms of the genome-wide  
826 (autosomal and the X chromosome) recombination rates for each population. Here,  $\rho$  is the  
827 population-scaled recombination rate which is the product of  $4N_e r$ , where  $N_e$  is the effective  
828 population size and  $r$  is the per-site recombination rate.  
829

830

831

832

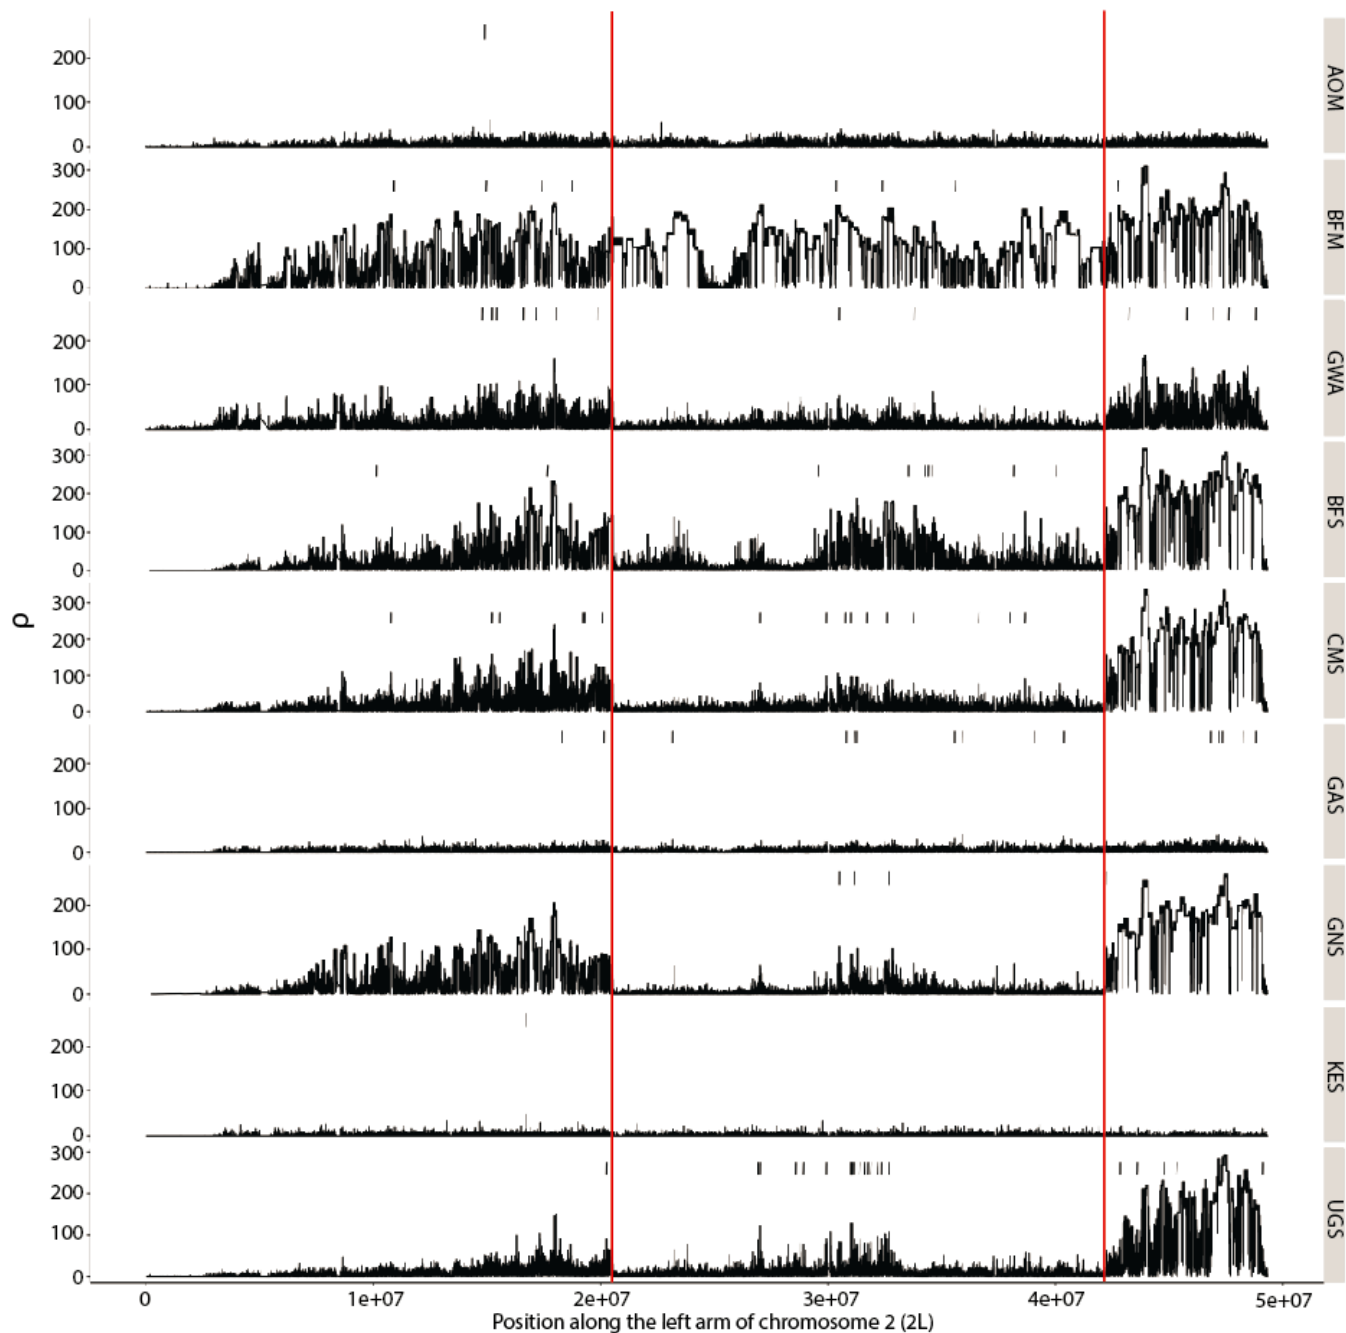

833  
834 Figure 3. The estimated population-scaled recombination map of the left arm of the second  
835 chromosome for all populations. The small black vertical lines at the top of each map represents  
836 the location of a recombination hotspot identified from LDhot. The red lines denote the location  
837 of the 2La chromosomal inversions.  
838  
839

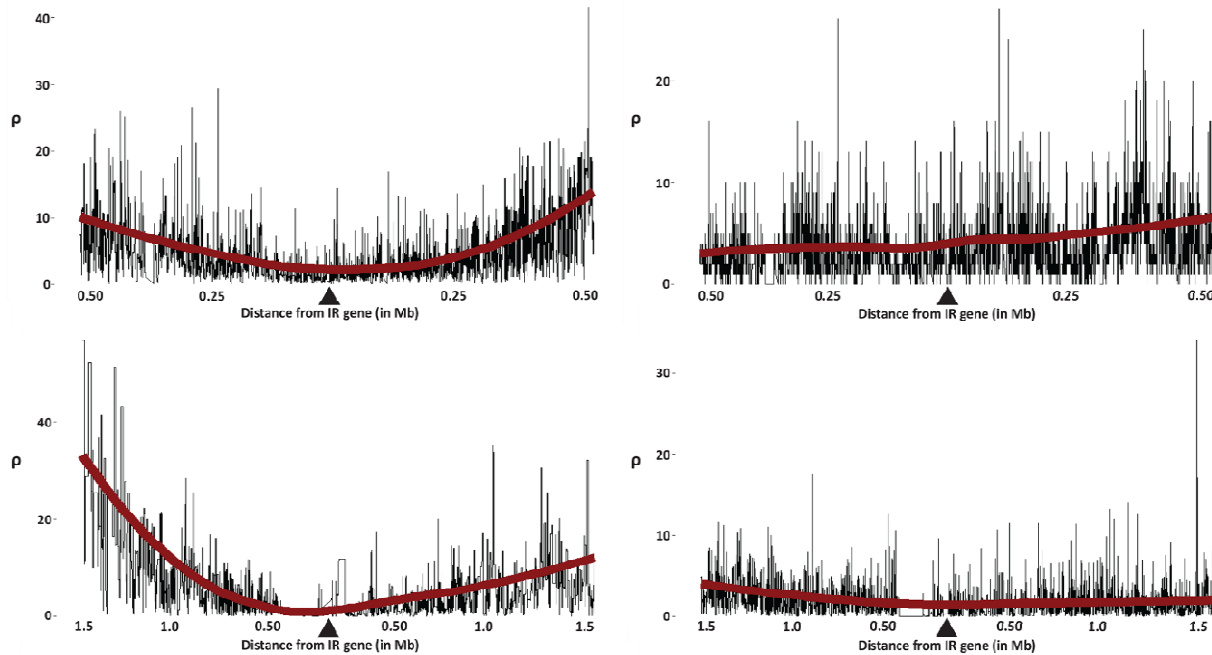

840  
841 Figure 4. Population-scaled recombination rate for a genomic window containing two known IR  
842 genes that are under selection in some populations but are evolving neutrally in others. The red  
843 line denotes a smoothed average of recombination rates for the given region. Top panel shows  
844 the changes in recombination rate in a 1 Mb window containing the Cyp6p gene. Note that this  
845 gene shows evidence of selection in UGS (top left) but not in GAS (top right). The lower panel  
846 shows the changes in recombination rate in a 3 Mb window containing the Cyp9k1 gene.  
847 Previous work has found evidence for selection in BFM but weakly selected (or nearly neutral)  
848 in AOM. Here, the black triangle denotes the position of the given IR gene.

849  
850  
851  
852  
853  
854  
855  
856  
857  
858  
859



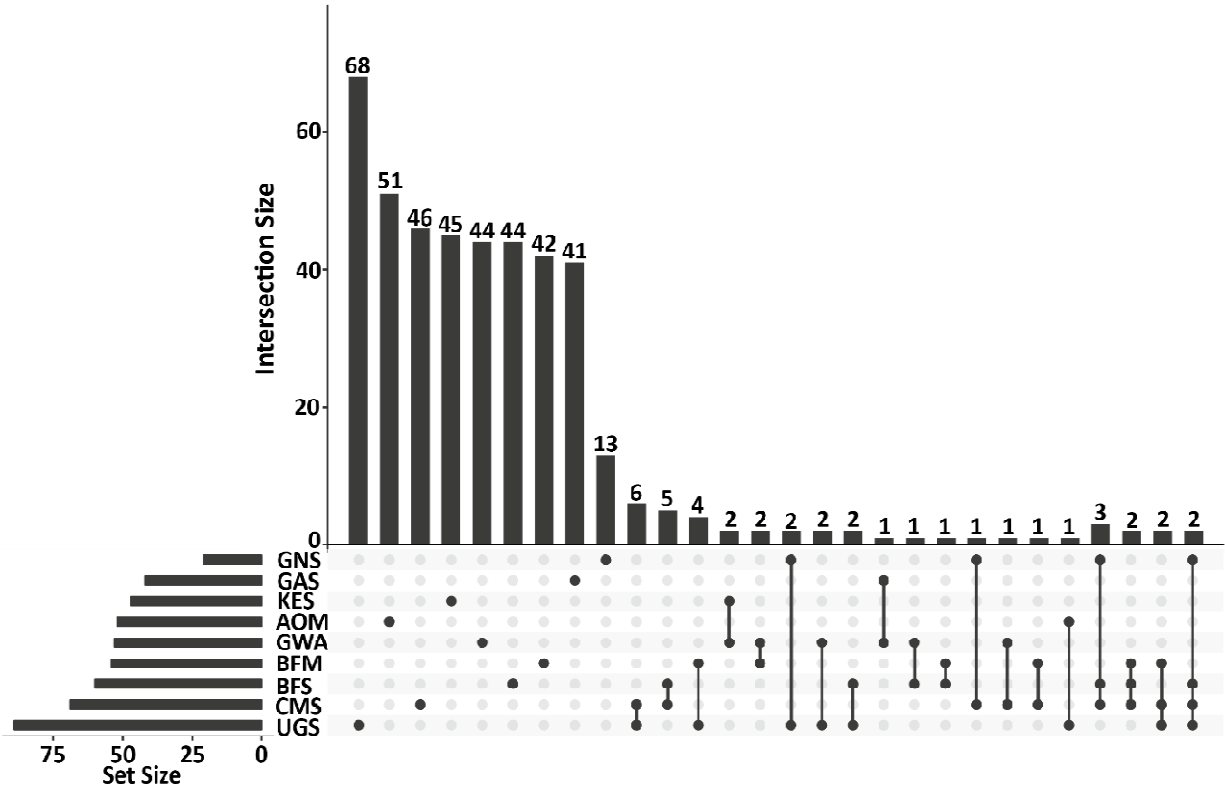

860  
 861 Figure 5. An Upset analysis depicting the distribution of unique and shared recombination  
 862 hotspots. Within this figure the set size represents the total number of hotspots found within each  
 863 population, while the intersection size defines the number of hotspots that were identified in a  
 864 single population (single dots) and the number of hotspots shared across multiple populations  
 865 (connected dots). The numbers at the top of each bar define the number of hotspot found within  
 866 that intersection.

867  
 868  
 869  
 870  
 871  
 872  
 873  
 874

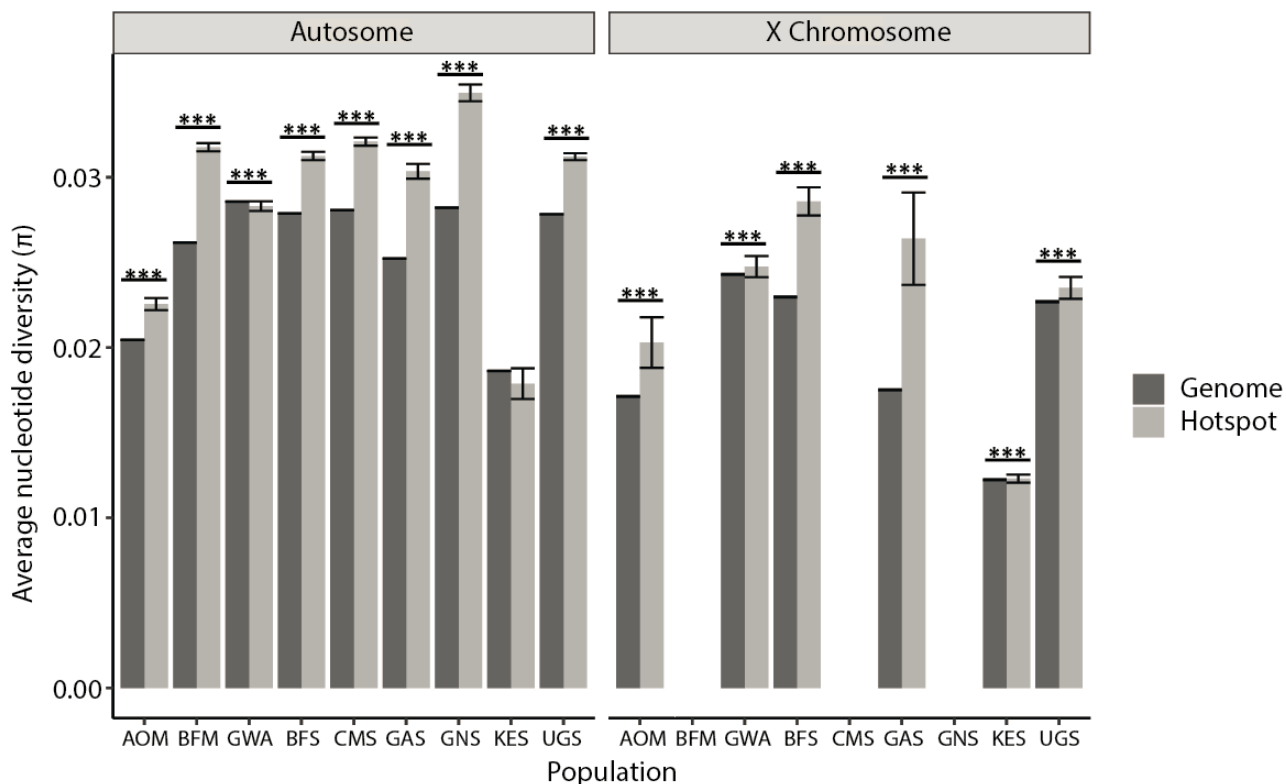

875  
 876 Figure 6. Barplot comparing nucleotide diversity within recombination hotspots and genome-  
 877 wide nucleotide diversity for the autosomes and X chromosomes. Vertical lines at the end of  
 878 each bar represents the standard error for each measurement. Solid horizontal bars and asterisks  
 879 denote significant differences between recombination hotspots and the overall genome. The  
 880 asterisks above the bars denotes the level of significance (\* = p-value  $\leq$  0.05, \*\* = p-value  $\leq$   
 881 0.01, and \*\*\* = p-value  $\leq$  0.001).  
 882  
 883  
 884  
 885  
 886  
 887  
 888  
 889  
 890  
 891  
 892  
 893  
 894  
 895  
 896  
 897  
 898  
 899

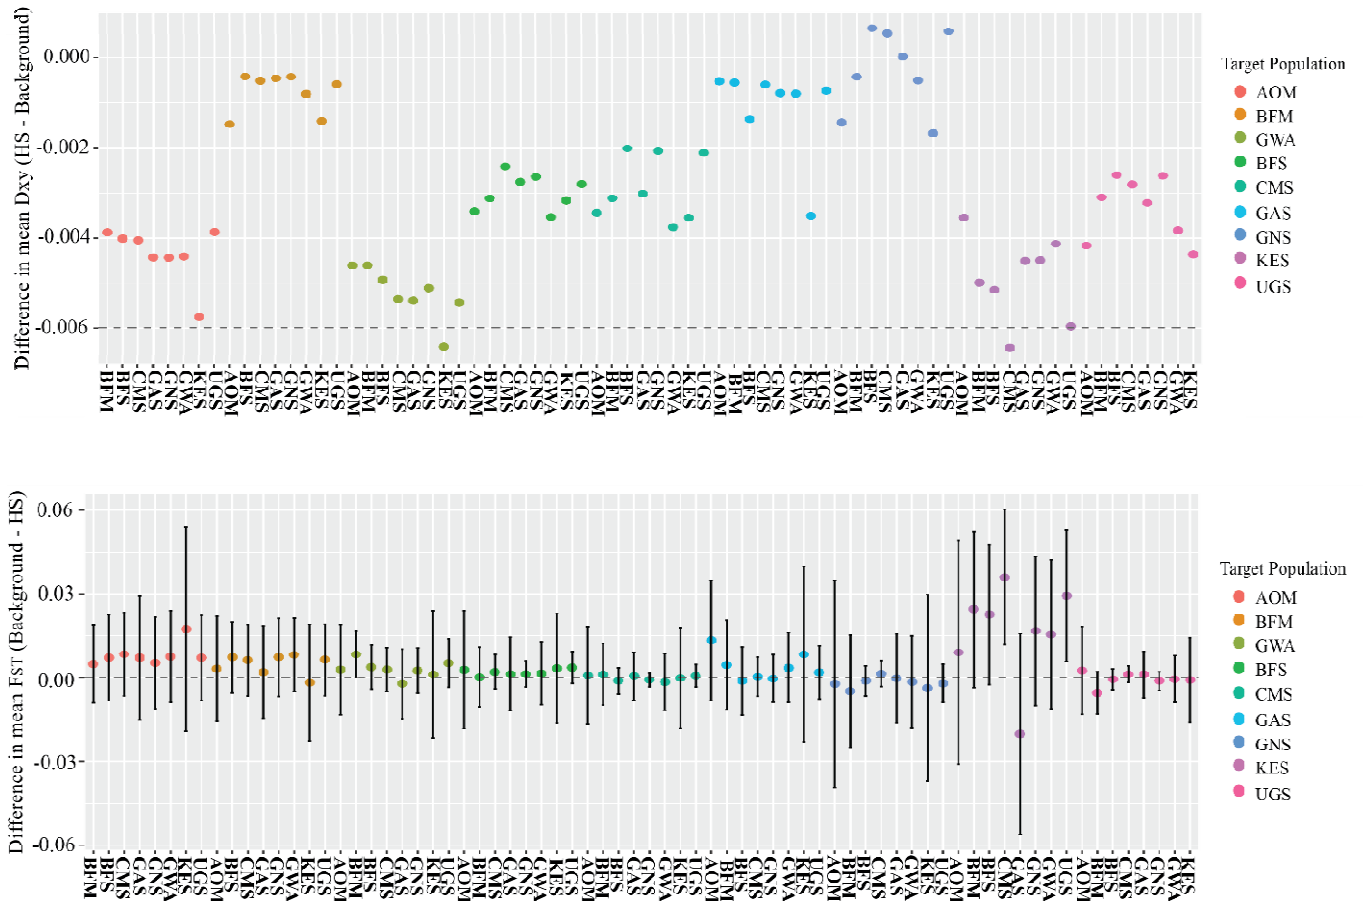

900  
901

902  
903  
904  
905  
906  
907  
908  
909  
910

Figure 7. Barplots that show the ratio between dxy (top panel) and  $F_{ST}$  (bottom panel) within recombination hotspots compared to background estimates for autosomal chromosomes. For each plot, the target population is the population in which within recombination hotspots are being compared to the same genomic regions with the populations labeled along the X-axis. The dashed black line signifies no difference in divergence metrics (dxy or  $F_{ST}$ ) between the genomic background and hotspots. The asterisks above represents significant pairwise comparisons.
